# Supplementary material
Source: PubMed Central journal article supplement (PMC3926142)
Supplement: Supp_Figure1.pdf [file Supp_Figure1.pdf]

## Supplementary Data

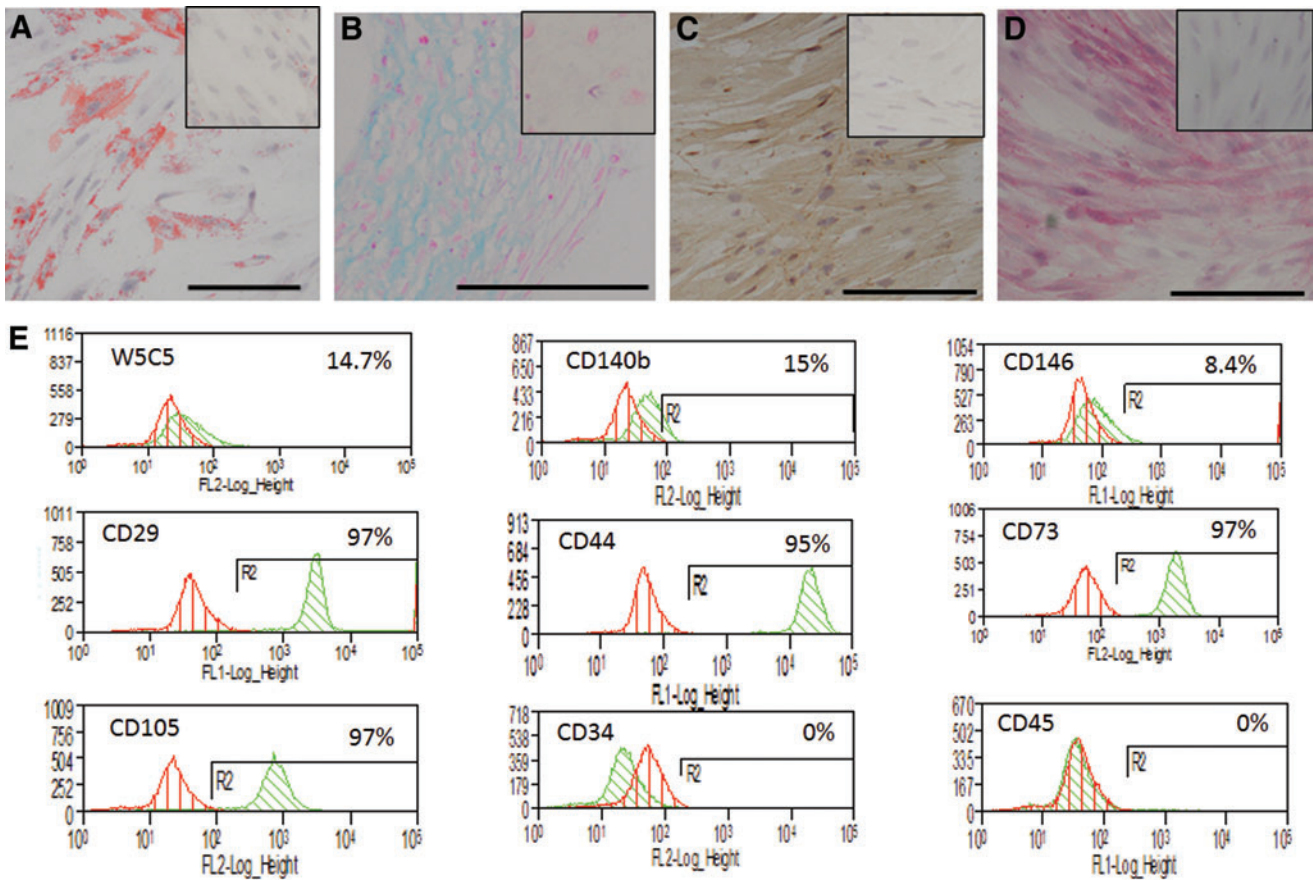

**SUPPLEMENTARY FIG. S1.** Histological staining of P6 W5C5+ endometrial mesenchymal stem cells (eMSC) after 4 weeks culture in (A) adipogenic, (B) chondrogenic, (C) myogenic, and (D) osteogenic induction media stained for (A) Oil Red O, (B) Alcian blue, (C) alpha-smooth muscle actin ( $\alpha$ SMA), (D) and Alkaline Phosphatase. (E) Flow cytometric analysis of P6 W5C5+eMSC showing mesenchymal stem cells (MSC) positive and negative markers as indicated. Scale bar in (A, C, D) indicates 200  $\mu$ m, in (B) 100  $\mu$ m.
