# Supplementary material
Source: PubMed Central journal article supplement (PMC3926142)
Supplement: Supp_Figure3.pdf [file Supp_Figure3.pdf]

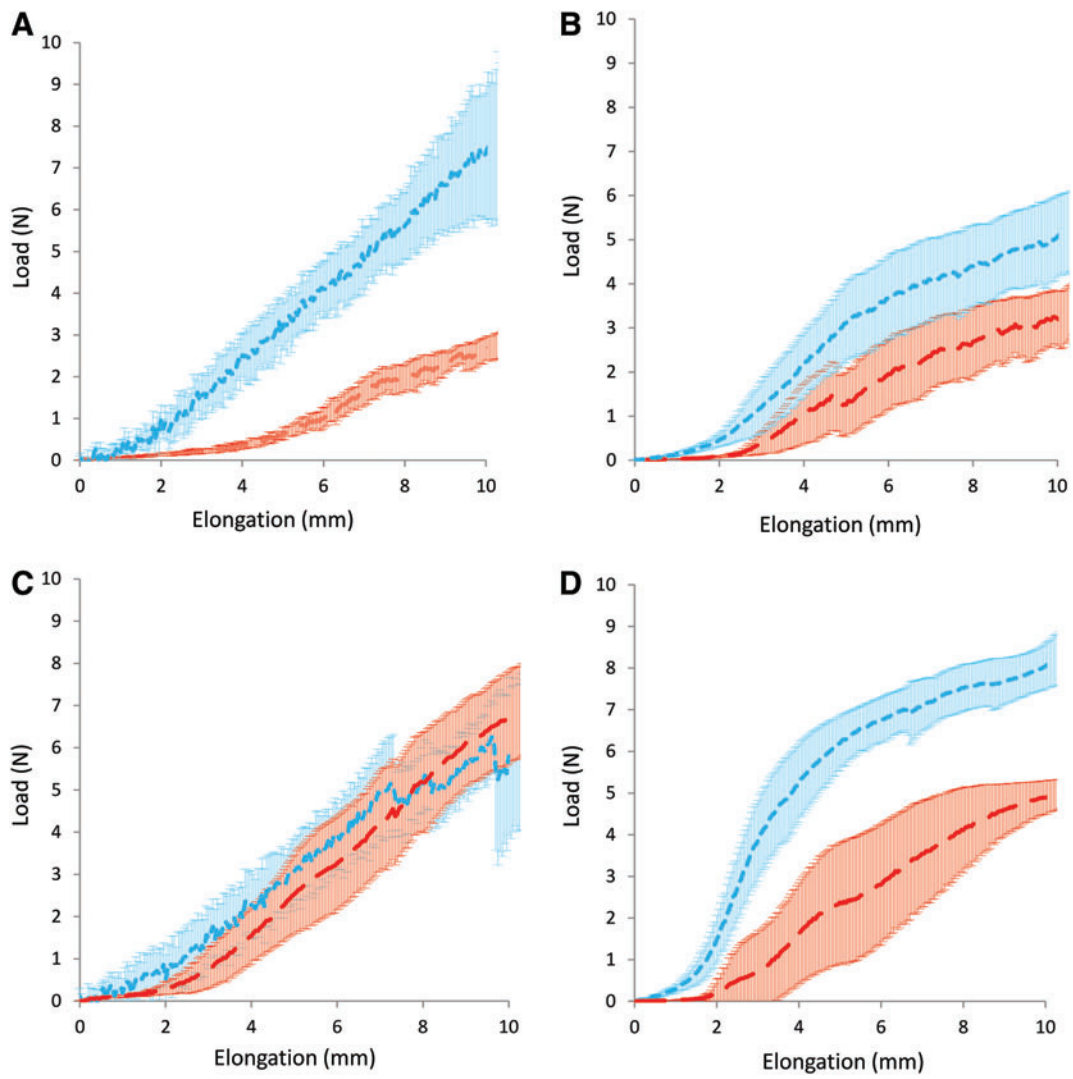

**SUPPLEMENTARY FIG. S3.** Average load–elongation curves of explanted meshes ( $n=8$ ) on (A, C) day 7 and (B, D) day 90 in mesh cross direction (A, B) and mesh machine direction (C, D). Dashed line indicates meshes implanted with eMSC, dotted line indicates meshes implanted without eMSC ( $n=6$ ). Error bars are 95% confidence intervals.
